# Supplementary material for: Higher prescription of antidepressants and/or anxiolytics among chronic obstructive pulmonary disease patients
Source: PubMed Central journal article supplement — Ther Adv Respir Dis. 2021 Mar 22;15:1753466620961696. doi: 10.1177/1753466620961696 (PMC8093612; doi:10.1177/1753466620961696), 2021-03-22
Supplement: sj-pdf-2-tar-10.1177_1753466620961696.pdf [file sj-pdf-2-tar-10.1177_1753466620961696.pdf]

## Author Response 2

Reviewer: 1

Comments to the Author

Evaluation Manuscript ID: TAR-20-O47 (R1)

Title: Higher prescription of antidepressants and/or anxiolytics among COPD patients versus subjects without or with other chronic diseases

**We thank the reviewer for the valuable comments and below we address them point by point.**

Comments

Title too long and has an acronym, which should preferably be avoided in titles

- ✓ **The title has been shortened and the acronym has been removed**

Page 1:

*Higher prescription of antidepressants and/or anxiolytics among chronic obstructive pulmonary disease patients*

Abstract

Got better.

Keywords: they did not make the adjustments on the keywords with the exception of the last one that eliminated them. MeSH descriptors must be used.

- ✓ **The MeSH descriptors have been added.**

Page 2:

***Pulmonary Disease, Chronic Obstructive; Chronic Disease; Antidepressive Agents; Anti-Anxiety Agents; Prescriptions***

Methods. Again: The authors say it is a retrospective, cross-sectional study. But they are doing an analytical cohort study, comparing the cohort of COPD patients with a control group without chronic disease. It is a retrospective cohort study.

- ✓ **We agree with the reviewer. This has been changed in the methods section:**

Page 5, line 4:

***In a retrospective cohort study, data was obtained from the NControl database (2013-2018) including dispensing data from 800 pharmacies and over 7 million patients, located in different regions in the Netherlands.***

Discussion. They improved the discussion.

Comments: They made no changes to MeSH descriptors, or the title, and I still consider the methods to be a cohort study.
