# Supplementary material for: Higher prescription of antidepressants and/or anxiolytics among chronic obstructive pulmonary disease patients
Source: PubMed Central journal article supplement — Ther Adv Respir Dis. 2021 Mar 22;15:1753466620961696. doi: 10.1177/1753466620961696 (PMC8093612; doi:10.1177/1753466620961696), 2021-03-22
Supplement: sj-pdf-4-tar-10.1177_1753466620961696.pdf [file sj-pdf-4-tar-10.1177_1753466620961696.pdf]

Reviewer 1 v.2

Comments to the Author

Evaluation Manuscript ID: TAR-20-O47 (R1)

Title: Higher prescription of antidepressants and/or anxiolytics among COPD patients versus subjects without or with other chronic diseases

Comments

Title too long and has an acronym, which should preferably be avoided in titles

Abstract

Got better.

Keywords: they did not make the adjustments on the keywords with the exception of the last one that eliminated them. MeSH descriptors must be used.

Methods. Again: The authors say it is a retrospective, cross-sectional study. But they are doing an analytical cohort study, comparing the cohort of COPD patients with a control group without chronic disease. It is a retrospective cohort study.

Discussion. They improved the discussion.

Comments: They made no changes to MeSH descriptors, or the title, and I still consider the methods to be a cohort study.
