# Supplementary material for: Higher prescription of antidepressants and/or anxiolytics among chronic obstructive pulmonary disease patients
Source: PubMed Central journal article supplement — Ther Adv Respir Dis. 2021 Mar 22;15:1753466620961696. doi: 10.1177/1753466620961696 (PMC8093612; doi:10.1177/1753466620961696), 2021-03-22
Supplement: sj-pdf-5-tar-10.1177_1753466620961696.pdf [file sj-pdf-5-tar-10.1177_1753466620961696.pdf]

Reviewer 2 v.1

Comments to the Author

In general , the draft was well written

I have some comments

1 please address the definition of COPD more clear .

2 author may clarify the asthma with COPD? The study group excluded the asthma with COPD?

3 Please discuss the life style , occupation , diet and exercise . these may be the confounding factors

thank you !
