# Supplementary material for: Higher prescription of antidepressants and/or anxiolytics among chronic obstructive pulmonary disease patients
Source: PubMed Central journal article supplement — Ther Adv Respir Dis. 2021 Mar 22;15:1753466620961696. doi: 10.1177/1753466620961696 (PMC8093612; doi:10.1177/1753466620961696), 2021-03-22
Supplement: sj-pdf-6-tar-10.1177_1753466620961696.pdf [file sj-pdf-6-tar-10.1177_1753466620961696.pdf]

**Supplementary table 1.** Categories of drugs with the respective WHO ATC codes.

| Group                                                                    | ATC     | Segment                                     | Details                                           |
|--------------------------------------------------------------------------|---------|---------------------------------------------|---------------------------------------------------|
| Antidepressants and anxiolytics for anxiety and/or depression indication | N05BA   | Anxiolytics                                 | Benzodiazepine derivates                          |
|                                                                          | N05BD   | Anxiolytics                                 | Dibenzo-bicyclo-octadiene derivatives             |
|                                                                          | N05BE   | Anxiolytics                                 | Azaspirodecanedione derivatives                   |
|                                                                          | N06A    | Antidepressants                             |                                                   |
|                                                                          | N06CA   | Antidepressants                             | Antidepressants in combination with psycholeptics |
| Oral antidiabetics                                                       | A10B    | Blood glucose lowering drugs excl. insulins |                                                   |
| Dermatologicals                                                          | D02     | Emollients and protectives                  |                                                   |
|                                                                          | D04     | Antipruritics                               |                                                   |
|                                                                          | D05     | Antipsoriatics                              |                                                   |
|                                                                          | D07     | Dermatological corticosteroids              |                                                   |
|                                                                          | D11     | Other dermatological preparations           |                                                   |
| Hypercholesterolemia                                                     | C10AA   | HMG CoA reductase inhibitors                | Statins                                           |
| Antirheumatics                                                           | A07EC01 | DMARDS                                      | Sulfasalazine                                     |
|                                                                          | L04AA13 | DMARDS                                      | Leflunomide                                       |
|                                                                          | L04AB01 | DMARDS                                      | Etanercept                                        |
|                                                                          | L04AB02 | DMARDS                                      | Infliximab                                        |
|                                                                          | L04AB03 | DMARDS                                      | Afelimumab                                        |
|                                                                          | L04AB04 | DMARDS                                      | Adalimumab                                        |
|                                                                          | L04AB05 | DMARDS                                      | Certolizumab pegol                                |
|                                                                          | L04AB06 | DMARDS                                      | Golimumab                                         |
|                                                                          | P01BA02 | DMARDS                                      | Hydroxychloroquine                                |
| COPD medication                                                          | H02AB02 | Oral glucocorticoids                        | Dexamethasone                                     |
|                                                                          | H02AB06 | Oral glucocorticoids                        | Prednisolone                                      |
|                                                                          | H02AB07 | Oral glucocorticoids                        | Prednisone                                        |
|                                                                          | R03AC12 | Selective beta-2-adrenoreceptor agonists    | Salmeterol                                        |
|                                                                          | R03AC13 | Selective beta-2-adrenoreceptor agonists    | Formoterol                                        |
|                                                                          | R03AC18 | Selective beta-2-adrenoreceptor agonists    | Indacaterol                                       |

|  |         |                                                                                                 |                                        |
|--|---------|-------------------------------------------------------------------------------------------------|----------------------------------------|
|  | R03AC19 | Selective beta-2-adrenoreceptor agonists                                                        | Olodaterol                             |
|  | R03AK06 | Adrenergics in combination with corticosteroids or other drugs, excl. anticholinergics          | Salmeterol and fluticasone             |
|  | R03AK07 | Adrenergics in combination with corticosteroids or other drugs, excl. anticholinergics          | Formoterol with budesonide             |
|  | R03AK08 | Adrenergics in combination with corticosteroids or other drugs, excl. anticholinergics          | Formoterol with beclometasone          |
|  | R03AK09 | Adrenergics in combination with corticosteroids or other drugs, excl. anticholinergics          | Formoterol with mometasone             |
|  | R03AK10 | Adrenergics in combination with corticosteroids or other drugs, excl. anticholinergics          | Vilanterol and fluticasone furoate     |
|  | R03AK11 | Adrenergics in combination with corticosteroids or other drugs, excl. anticholinergics          | Formoterol and fluticasone             |
|  | R03AL03 | Adrenergics in combination with anticholinergics incl. triple combinations with corticosteroids | Vilanterol and umeclidinium bromide    |
|  | R03AL04 | Adrenergics in combination with anticholinergics incl. triple combinations with corticosteroids | Indacaterol and glycopyrronium bromide |
|  | R03AL05 | Adrenergics in combination with anticholinergics incl. triple combinations with corticosteroids | Formoterol and aclidinium bromide      |
|  | R03AL06 | Adrenergics in combination with anticholinergics incl. triple combinations with corticosteroids | Olodaterol and tiotropium bromide      |

|         |                                                                                                 |                                                          |
|---------|-------------------------------------------------------------------------------------------------|----------------------------------------------------------|
| R03AL08 | Adrenergics in combination with anticholinergics incl. triple combinations with corticosteroids | Vilanterol, umeclidinium bromide and fluticasone furoate |
| R03AL09 | Adrenergics in combination with anticholinergics incl. triple combinations with corticosteroids | Formoterol, glycopyrronium bromide and beclometasone     |
| R03BA01 | Glucocorticoids                                                                                 | Beclometasone                                            |
| R03BA02 | Glucocorticoids                                                                                 | Budesonide                                               |
| R03BA03 | Glucocorticoids                                                                                 | Flunisolide                                              |
| R03BA04 | Glucocorticoids                                                                                 | Betamethasone                                            |
| R03BA05 | Glucocorticoids                                                                                 | Fluticasone                                              |
| R03BA06 | Glucocorticoids                                                                                 | Triamcinolone                                            |
| R03BA07 | Glucocorticoids                                                                                 | Mometasone                                               |
| R03BA08 | Glucocorticoids                                                                                 | Ciclesonide                                              |
| R03BA09 | Glucocorticoids                                                                                 | Fluticasone furoate                                      |
| R03BB04 | Anticholinergics                                                                                | Tiotropium bromide                                       |
| R03BB05 | Anticholinergics                                                                                | Acridinium bromide                                       |
| R03BB06 | Anticholinergics                                                                                | Glycopyrronium bromide                                   |
| R03BB07 | Anticholinergics                                                                                | Umeclidinium bromide                                     |
|         |                                                                                                 |                                                          |
